# Supplementary material for: Vasopressin Receptor Type-2 Mediated Signaling in Renal Cell Carcinoma Stimulates Stromal Fibroblast Activation
Source: MDPI journal article supplement (doi:10.3390/ijms23147601), 2022-07-09
Supplement: s1 [file s1]

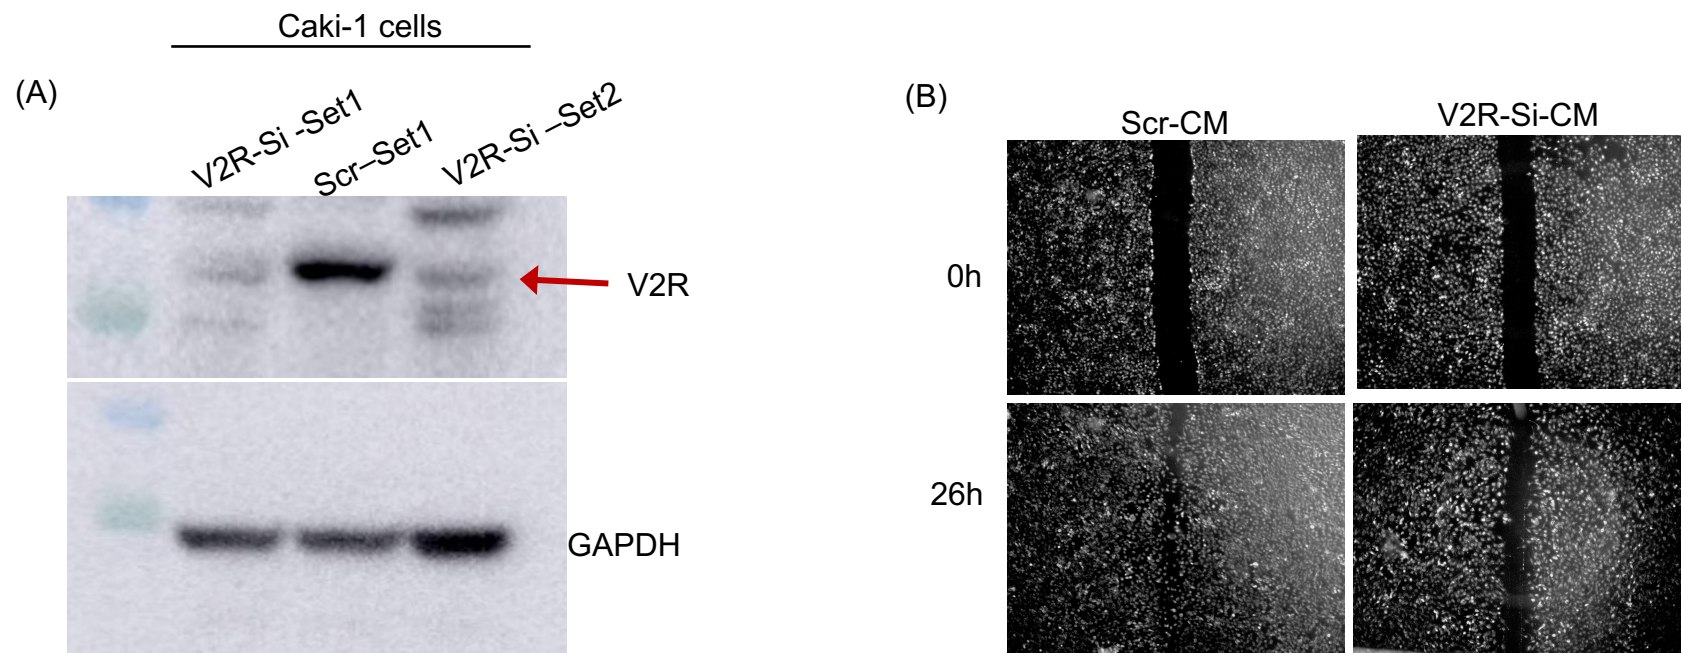

**Supplemental Figure S1:** (A) Immunoblot shows Caki-1 cells gene silenced for V2R (SiRNA) or Scr (Scrambled RNA). (B) Representative images of wound closure in scratch assay on NRK-49F cells exposed to CM from Scr or V2R-SiRNA transfected Caki-1 cells

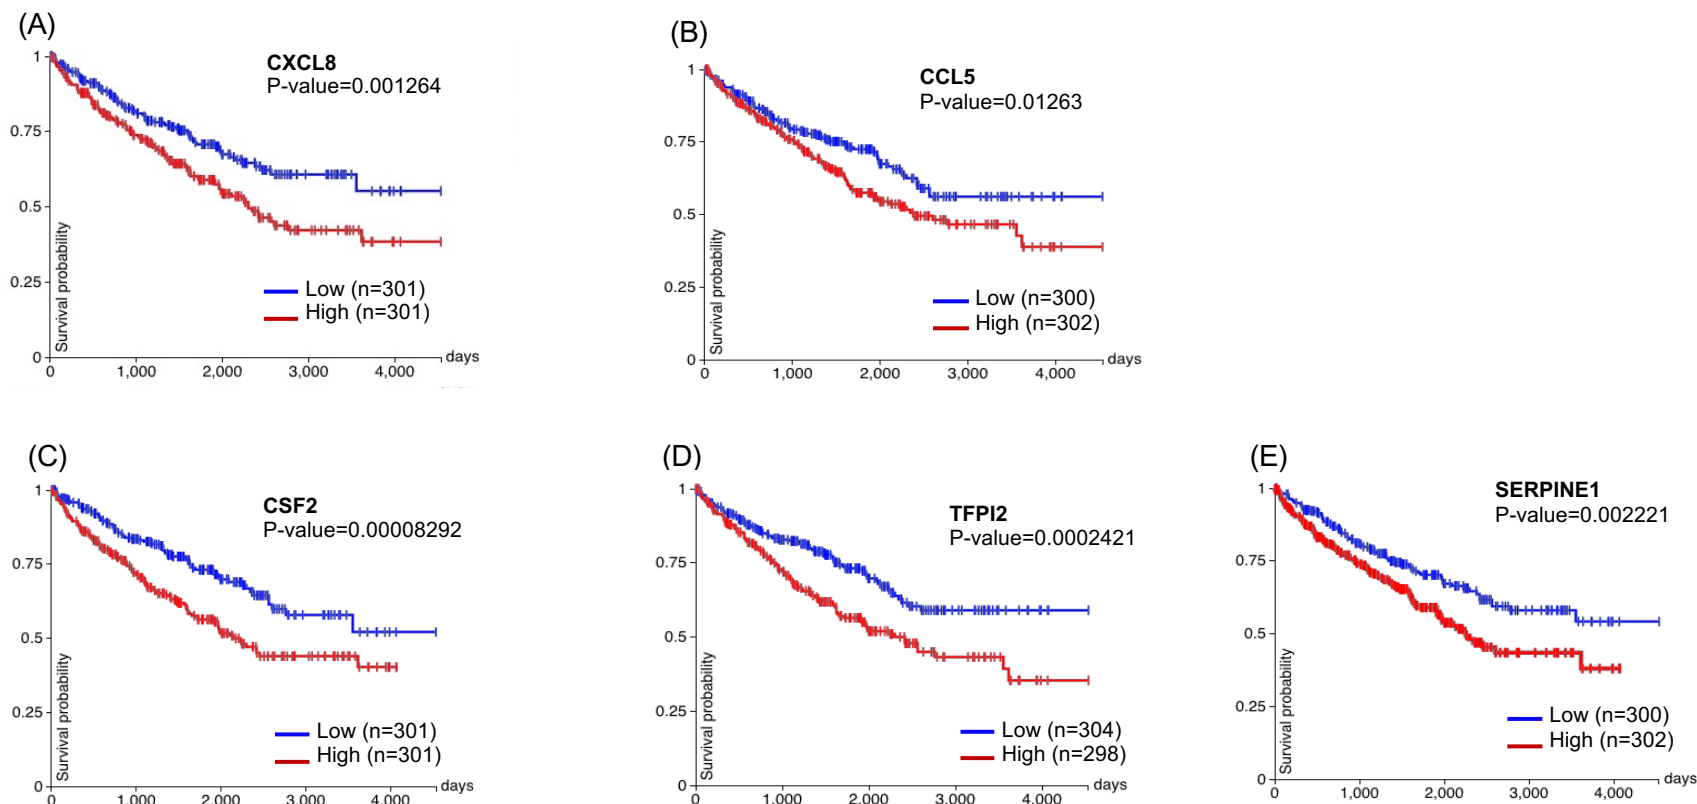

**Supplemental Figure S2:** Analysis of The Cancer Genome Atlas (TCGA) kidney clear cell carcinoma (KIRC) database for RNA sequencing data related to ccRCC shows significantly reduced overall survival in high expressors of CXCL8 (IL8), CCL5, CSF2, TFPI-2 and SERPINE1 (PAI1).

**Supplemental- Table S1:****Human Primers used for QRT-PCR:**

| <b>Gene Name</b> | <b>Primers Forward (F) and Reverse (R)</b>                   |
|------------------|--------------------------------------------------------------|
| CTGF             | F CGACTGGAAGACACGT TTGG<br>R AGGCTTGGAGATTTTGGGAG            |
| SPARC            | F ATCTAAATCCACTCCTTCCACAG<br>R CACCGTTAATGTATTCACTTAAATC     |
| OPN              | F TGAGAGCAATGAGCATTCCGATG<br>R CAGGGAGTTTCCATGAAGCCAC        |
| MMP1             | F ACAGCCCAGTACTTATTCCCTTTG<br>R GGGCTTGAAGCTGCTTACGA         |
| PAI-1            | F GGCCATTACTACGACATCCTG<br>R GGTCAATGTTGCCTTTCCAGT           |
| AREG             | F GTGGTGCTGTCGCTCTTGATA<br>R ACTCACAGGGGAAATCTCACT           |
| CYR61            | F GAGTGGGTCTGTGACGAGGAT<br>R GGTTGTATAGGATGCGAGGCT           |
| ICAM1            | F CCTTCCTCACCGTGTACTGG<br>R AGCGTAGGGTAAGGTTCTTGC            |
| TSP1             | F AACAAACCCACACCCCAAGTTTG<br>R TTGAAGCAGGCATCAGTCAC          |
| TIMP1            | F GACGGCCTTCTGCAATTCC<br>R GTATAAGGTGGTCTGGTTGACTTCTG        |
| TIMP2            | F GAGCCTGAACCACAGGTACCA<br>R TCTGTGACCCAGTCCATCCA            |
| Adamts2          | F CTGGCAAGCATTGTTTTAAAGGA<br>R GGAGCCAAACGGACTCCAA           |
| TGF- $\beta$     | F GAG CCT GAG GCC GAC TAC TA<br>R GGG TTC AGG TAC CGC TTC TC |
| CSF-1            | F CCAGGAACAGTTGAAAGATCCA<br>R TTATCTCTGAAGCCATGGTGT          |
| CSF-2            | F CACTGCTGCTGAGATGAATGAAA<br>R GTCTGTAGGCAGGTCGGCTC          |
| PDGF-A           | F CCCCTGCCCATTTCGGAGGAAGAG<br>R TTGGCCACCTTGACGCTGCGGTG      |
| Cxcl10           | F GTGGCATTCAAGGAGTACCTC<br>R TGATGGCCTTCGATTCTGGATT          |
| CCL2             | F CCGAGAGGCTGAGACTAAC<br>R CTTGCTGCTGGTGATTCTTC              |
| CCL5             | F CCTCGCTGTCATCCTCATTG<br>R GGGTTGGCACACACTTGG               |

|                |                                                              |
|----------------|--------------------------------------------------------------|
| CCL20          | F - AAGTTGTCTGTGTGCGCAAATCC<br>R - CCATTCCAGAAAAGCCACAGTTTT  |
| IL1b           | F AAACAGATGAAGTGCTCCTTCCAGG<br>R TGGAGAACACCACTTGTTGCTCCA    |
| IL6            | F AATTCGGTACATCCTCGACGG<br>R GGTTGTTTTCTGCCAGTGCC            |
| IL8            | F GACCACACTGCGCCAACAC<br>R CTTCTCCACAACCCTCTGCAC             |
| TNFa           | F CCG AGG CAG TCA GAT CAT CTT<br>R AGC TGC CCC TCA GCT TGA   |
| SEMA7A         | F TGTGTATTCCCTCGGTGACA<br>R GAGTGGAACAATGGCGTCTT             |
| TFPI-2         | F CCAGATGAAGCTACTTGTATG<br>R GCACATGCACGTTTGCAATC            |
| GAPDH          | F CCA GGT GGT CTC CTC TGA CT<br>R TGC TGT AGC CAA ATT CGT TG |
| $\beta$ -actin | F CACCATTGGCAATGAGCGGTTC<br>R AGGTCTTTGCGGATGTCCACGT         |
